# Supplementary material
Source: MDPI journal article supplement (https://www.mdpi.com/2673-8104/3/4/40)
Supplement: s1 [file s1]

## Supplementary Material

**Table S1**

Psychological effects of relational job characteristics scale items in English and Portuguese.

|       | Totally disagree                                                       | Disagree | Moderately disagree    | Neither agree nor disagree                                                                    | Moderately agree       | Agree    | Strongly agree    |
|-------|------------------------------------------------------------------------|----------|------------------------|-----------------------------------------------------------------------------------------------|------------------------|----------|-------------------|
|       | 1                                                                      | 2        | 3                      | 4                                                                                             | 5                      | 6        | 7                 |
|       | Discordo totalmente                                                    | Discordo | Discordo moderadamente | Não concordo nem discordo                                                                     | Concordo moderadamente | Concordo | Concordo totemnte |
| Items | Psychological Effects of Relational Job Characteristics (PERJCs) Scale |          |                        | Escala dos Efeitos Psicológicos das Características Relacionais do Trabalho (EEPCRT)          |                        |          |                   |
|       | Perceived Social Impact                                                |          |                        | Impacto Social Percebido                                                                      |                        |          |                   |
| 1     | I am very conscious of the positive impact that my work has on others  |          |                        | Estou muito consciente do impacto positivo que meu trabalho tem nos outros (trab21)           |                        |          |                   |
| 2     | I am very aware of the ways in which my work is benefiting others      |          |                        | Estou muito consciente das formas como o meu trabalho beneficia os outros (trab 20)           |                        |          |                   |
| 3     | I feel that I can have a positive impact on others through my work     |          |                        | Acho que meu trabalho faz diferença positivamente nas vidas de outras pessoas (trab 19)       |                        |          |                   |
| 4     | My work really makes others' lives better                              |          |                        | O meu trabalho realmente torna a vida dos outros melhor (trab 22)                             |                        |          |                   |
| 5     | I have positive impact on others in my work on a regular basis         |          |                        | No meu trabalho, frequentemente tenho um impacto positivo na vida de outras pessoas (trab 23) |                        |          |                   |
| 6     | My work has positive impact on a large number of people                |          |                        | O meu trabalho tem um impacto positivo num grande número de pessoas (trab 24)                 |                        |          |                   |
|       | Perceived Social Worth                                                 |          |                        | Valor Social Percebido                                                                        |                        |          |                   |
| 7     | I feel that others appreciate my work                                  |          |                        | Acho que as outras pessoas apreciam meu trabalho (trab 30)                                    |                        |          |                   |
| 8     | I feel that other people value my contributions at work                |          |                        | Sinto que as outras pessoas valorizam minhas contribuições no trabalho (trab 31)              |                        |          |                   |
| 9     | I feel that other people respect me for my work                        |          |                        | Acho que as outras pessoas me respeitam pelo meu trabalho (trab 32)                           |                        |          |                   |
|       | Affective Commitment to Clients                                        |          |                        | Comprometimento Afetivo com os Clientes                                                       |                        |          |                   |
| 10    | The people who benefit from my work are very important to me           |          |                        | As pessoas que se beneficiam do meu trabalho são importantes para mim (trab 28)               |                        |          |                   |
| 11    | I care deeply about the people who benefit from my work                |          |                        | Preocupo-me profundamente com as pessoas que se beneficiam do meu trabalho (trab 29)          |                        |          |                   |

Note. The items, both in English and Portuguese, came from (Santos et al., 2017a)

**Table S2**

Prosocial motivation scale items in English and Portuguese.

|       | Totally disagree                                                                     | Disagree | Moderately disagree    | Neither agree nor disagree                                                                     | Moderately agree       | Agree    | Strongly agree      |
|-------|--------------------------------------------------------------------------------------|----------|------------------------|------------------------------------------------------------------------------------------------|------------------------|----------|---------------------|
|       | 1                                                                                    | 2        | 3                      | 4                                                                                              | 5                      | 6        | 7                   |
|       | Discordo totalmente                                                                  | Discordo | Discordo moderadamente | Não concordo nem discordo                                                                      | Concordo moderadamente | Concordo | Concordo totalmente |
| Items | <b>Prosocial Motivation Scale (PSMS)</b>                                             |          |                        | <b>Escala de Motivação Pró-Social (EMPS)</b>                                                   |                        |          |                     |
| 1     | Because it is important to me to do good for others through my work                  |          |                        | Para mim é importante poder fazer “coisas boas” aos outros através do meu trabalho.            |                        |          |                     |
| 2     | Because I care about benefiting others through my work                               |          |                        | Eu preocupo-me em trazer benefícios a outras pessoas através do meu trabalho.                  |                        |          |                     |
| 3     | Because I want to help others through my work                                        |          |                        | Quero ajudar os outros com o meu trabalho.                                                     |                        |          |                     |
| 4     | Because I want to have positive impact on others                                     |          |                        | Com o meu trabalho, quero ter um impacto positivo noutras pessoas.                             |                        |          |                     |
| 5     | I get energized by working on tasks that have the potential to benefit others        |          |                        | Sinto-me mais enérgico ao trabalhar em tarefas que têm a potencialidade de ajudar os outros.   |                        |          |                     |
| 6     | I like to work on tasks that have the potential to benefit others                    |          |                        | Gosto de realizar tarefas que têm a potencialidade de beneficiar outras pessoas.               |                        |          |                     |
| 7     | I prefer to work on tasks that allow me to have a positive impact on others          |          |                        | Prefiro realizar tarefas que me permitem ter um impacto positivo nas outras pessoas.           |                        |          |                     |
| 8     | I do my best when I’m working on a task that contributes to the well-being of others |          |                        | Dou o meu melhor quando trabalho numa tarefa que contribui para o bem-estar de outras pessoas. |                        |          |                     |
| 9     | It is important to me to have the opportunity to use my abilities to benefit others  |          |                        | É importante para mim poder utilizar as minhas competências para ajudar os outros.             |                        |          |                     |
| 10    | It is important to me to make a real difference in people’s lives through my work    |          |                        | É importante para mim, através do meu trabalho, fazer diferença positiva na vida das pessoas.  |                        |          |                     |
| 11    | At work, I care about improving the welfare of other people                          |          |                        | No trabalho, preocupo-me em melhorar o bem-estar das outras pessoas.                           |                        |          |                     |
| 12    | One of my objectives at work is to make a positive difference in others’ lives       |          |                        | Um dos meus objetivos no trabalho é fazer uma diferença positiva nas vidas das outras pessoas. |                        |          |                     |

Note. Items 1–4 came from (Grant, 2008c), 5–9 from (Grant and Sumanth, 2009), 10–12 from (Grant, 2008a).

**Table S3**

Utrecht work engagement scale—nine items in English and Portuguese

|       | Never                                                   | A few times a year    | Once a month or less       | A few times a month                                              | Once a week        | A few times a week       | Every day     |
|-------|---------------------------------------------------------|-----------------------|----------------------------|------------------------------------------------------------------|--------------------|--------------------------|---------------|
|       | 0                                                       | 1                     | 2                          | 3                                                                | 4                  | 5                        | 6             |
|       | Nunca                                                   | Algumas vezes por ano | Uma vez, ou menos, por mês | Algumas vezes por mês                                            | Uma vez por semana | Algumas vezes por semana | Todos os dias |
| Items | <b>Utrecht Work Engagement Scale—9 (UWES-9)</b>         |                       |                            | <b>Escala de Engajamento no Trabalho de Utrecht – 9 (EETU-9)</b> |                    |                          |               |
|       | <b>Vigor</b>                                            |                       |                            | <b>Vigor</b>                                                     |                    |                          |               |
| 1     | At my work, I feel bursting with energy                 |                       |                            | No meu trabalho, sinto-me cheia (o) de energia                   |                    |                          |               |
| 2     | At my job, I feel strong and vigorous                   |                       |                            | No meu trabalho, sinto-me forte e com vigor                      |                    |                          |               |
| 3     | When I get up in the morning, I feel like going to work |                       |                            | Quando acordo de manhã, sinto-me bem por ir trabalhar            |                    |                          |               |
|       | <b>Dedication</b>                                       |                       |                            | <b>Dedicação</b>                                                 |                    |                          |               |
| 4     | I am enthusiastic about my job                          |                       |                            | Estou entusiasmada (o) com o meu trabalho                        |                    |                          |               |
| 5     | My job inspires me                                      |                       |                            | O meu trabalho me inspira                                        |                    |                          |               |
| 6     | I am proud on the work that I do                        |                       |                            | Tenho orgulho no trabalho que faço                               |                    |                          |               |
|       | <b>Absorption</b>                                       |                       |                            | <b>Absorção</b>                                                  |                    |                          |               |
| 7     | I feel happy when I am working intensely                |                       |                            | Estou contente quando trabalho intensamente                      |                    |                          |               |
| 8     | I am immersed in my work                                |                       |                            | Estou imerso(a) no meu trabalho                                  |                    |                          |               |
| 9     | I get carried away when I'm working                     |                       |                            | Esqueço-me “do resto” quando trabalho                            |                    |                          |               |
